# Supplementary material for: Improvement of Diet after an Early Nutritional Intervention in Pediatric Oncology
Source: MDPI journal article supplement (doi:10.3390/children10040667), 2023-03-31
Supplement: s1 [file s1]

**Table S1.** Difference in the anthropometric characteristics of boys and girls between the initial assessment and after one year of nutritional intervention

| Characteristics<br>(z-scores) | Difference for boys<br>(one year – initial) |                      |                 | Difference for girls<br>(one year – initial) |                     |                 |
|-------------------------------|---------------------------------------------|----------------------|-----------------|----------------------------------------------|---------------------|-----------------|
|                               | n<br>(total)                                | Mean z-score ±<br>SD | <i>p</i> -value | <i>n</i><br>(total)                          | Mean z-score±<br>SD | <i>p</i> -value |
| Weight                        | 19                                          | 0.52 ± 0.65          | 0.003           | 17                                           | 0.03 ± 0.69         | 0.872           |
| Height                        | 19                                          | -0.07 ± 0.56         | 0.610           | 17                                           | -0.29 ± 0.52        | 0.032           |
| BMI                           | 19                                          | 0.74 ± 0.90          | 0.002           | 17                                           | 0.24 ± 0.80         | 0.228           |
| Waist circumference           | 3                                           | 0.29                 | 0.250           | 2                                            | Too small           |                 |
| MUAC                          | 9                                           | 0.58 ± 1.27          | 0.004           | 4                                            | -0.55               | 0.250           |
| TSFT                          | 7                                           | 1.03 ± 1.40          | 0.099           | 3                                            | 0.13                | 0.750           |
| SSFT                          | 5                                           | 0.05                 | 0.625           | 2                                            | Too small           |                 |
| Systolic blood pressure       | 19                                          | 0.60                 | 0.396           | 13                                           | -0.52               | 0.236           |
| Diastolic blood pressure      | 18                                          | -0.25 ± 0.77         | 0.186           | 13                                           | -0.06 ± 1.14        | 0.862           |

Anthropometric and clinical data were collected at initial visit and after one year of nutritional intervention. Data at initial assessment and after one year of nutritional follow-up were compared using paired t-tests or Wilcoxon. *p*-value <0.05 is considered statistically significant. BMI: body mass index [weight (kg) / height (m<sup>2</sup>)]; MUAC: mid-upper arm circumference; TSFT: triceps skinfold thickness; SSFT: subscapular skinfold thickness; SD: standard deviation

**Table S2.** Difference in the biochemical data of boys and girls at the initial assessment and after one year of nutritional intervention

| Biochemical data               | Difference for boys<br>(one year – initial) |                         |                 | Difference for girls<br>(one year – initial) |                         |                 |
|--------------------------------|---------------------------------------------|-------------------------|-----------------|----------------------------------------------|-------------------------|-----------------|
|                                | <i>n</i> total                              | Mean difference<br>± SD | <i>p</i> -value | <i>n</i> total                               | Mean difference<br>± SD | <i>p</i> -value |
| HbA1c (%)                      | 13                                          | 0.12 ± 0.86             | 0.636           | 9                                            | -0.60±0.57              | 0.014           |
| Vitamin D (mmol/L)             | 11                                          | 20.60 ± 36.69           | 0.092           | 10                                           | 7.84± 12.72             | 0.083           |
| C-reactive protein<br>(mmol/L) | 11                                          | 0.60                    | 0.898           | 11                                           | -0.40                   | 0.078           |
| Total cholesterol<br>(mmol/L)  | 13                                          | 0.27                    | 0.377           | 12                                           | 0.03                    | 0.895           |
| HDL-C (mmol/L)                 | 13                                          | 0.22 ± 0.39             | 0.058           | 11                                           | 0.32 ± 0.37             | 0.017           |
| LDL-C (mmol/L)                 | 13                                          | -0.18                   | 0.6848          | 11                                           | -0.23 ±0.83             | 0.387           |
| Non HDL-C<br>(mmol/L)          | 13                                          | 0.20                    | 0.542           | 11                                           | -0.40 ± 1.02            | 0.222           |
| Triglycerides<br>(mmol/L)      | 13                                          | -0.06                   | 0.723           | 12                                           | -0.15                   | 0.110           |
| 0-9 years<br>(mmol/L)          | 7                                           | -0.46 ± 0.89            | 0.218           | 9                                            | -0.40 ± 0.79            | 0.167           |
| 10-18 years<br>(mmol/L)        | 5                                           | 0.37                    | 0.500           | 3                                            | Too small               |                 |

Non-fasting blood samples were collected during clinical visits. Data at initial assessment and after one year of nutritional intervention were compared using paired t-tests or Wilcoxon tests. *p*-value <0.05 is considered statistically significant. HbA1C: glycosylated hemoglobin; HDL-C: high-density lipoprotein cholesterol; LDL-C: low-density lipoprotein cholesterol; Non HDL-C: non high-density lipoprotein cholesterol; SD: standard deviation.
